# Supplementary material
Source: PubMed Central journal article supplement (PMC2869265)
Supplement: en.2009-1436_1.pdf [file en.2009-1436_1.pdf]

**1 Supplemental Data****2 *Supplemental Methods*****3 *Leptin Resistance and pSTAT3 Immunohistochemistry***

4           Group housed (n=5/cage) animals were injected i.p. with mouse recombinant leptin (n=3/group;  
5 1mg/kg; Dr. Parlow, National Hormone and Peptide Program, Torrance, CA) in phosphate buffered saline  
6 (PBS), or PBS alone (n=2/group), and returned to their homecage. Thirty minutes following injection,  
7 animals were deeply anesthetized (pentobarbital: 200 mg/kg i.p.), and perfused intracardially with 5ml  
8 saline followed by 25ml of 4% paraformaldehyde in 0.1 M phosphate buffer (PB), pH 7.3. Brains were  
9 post-fixed for 4hr at 4°C, and cryoprotected in 20% sucrose in 0.1M PB overnight. Brains were sectioned  
10 at 35µm on a cryostat. Briefly, free-floating sections were incubated in a 1% hydrogen peroxide/1%  
11 NaOH buffer for 20min. Sections were then incubated in 3% glycine for 10min, followed by incubation in  
12 1% SDS for 10min. Then, sections were washed 3 X 10min in PBS, incubated in normal goat serum for  
13 1hr, and then placed in anti-pSTAT3 made in rabbit primary antibody (Cell Signaling, Beverly, MA) for  
14 24 hrs. Sections were then washed 5 X 10 min in PB with 1% Triton-XP (PBT), incubated in biotinylated  
15 goat anti-rabbit secondary (Vector Labs, Burlingame, CA; 1:250) for 1 hr, and washed. Sections were  
16 then treated with avidin-biotin complex (ABC, Vector Labs) for 1 hr, and washed. Staining was  
17 visualized with nickel chloride enhanced diaminobenzidine (Sigma Aldrich, St.Louis, MO). Sections  
18 were then mounted on gelatin-coated glass slides and coverslipped with Permount (Fisher Scientific,  
19 Hampton, NH). Slides were analyzed on a Nikon 90i microscope at 20X magnification. An optical grid  
20 covering 10,000µm<sup>2</sup> was overlaid on the arcuate nucleus, and cells counted throughout the depth of  
21 focus.

22

**23 *Supplemental Results***

24           The phosphorylation of STAT3 can be induced by leptin acting through the leptin receptor, and is  
25 a standard assay of leptin resistance (19). To probe if high-CORT treatment, which results in very high  
26 plasma leptin levels, also results in leptin insensitivity, we examined leptin induced phospho-STAT3

27 (pSTAT3) immunoreactivity in the arcuate nucleus (ARC) of the hypothalamus in high-CORT and  
28 vehicle treated animals. We found a statistically significant interaction (One-way ANOVA;  $F_{1,6}=11.74$ ,  
29  $p=0.04$ ), with leptin inducing an increase in ARC pSTAT3 staining in vehicle animals ( $p<0.01$ ) while  
30 there was no statistically significant induction in high-CORT animals ( $p>0.05$ ). These results suggest that  
31 high-CORT treatment induces leptin resistance, at least as measured by leptin-induced pSTAT3 staining  
32 in the ARC.

33

34 ***Supplemental Figure 1 Caption***

35 *High-CORT animals show blunted pSTAT3 staining in the arcuate nucleus following leptin challenge*

36 Bar graphs depicting the number of pSTAT3 immunoreactive cell profiles in the ARC of vehicle and  
37 high-CORT animals following leptin injection. While robust pSTAT3 staining is induced following leptin  
38 challenge in vehicle animals, this response is significantly blunted in high-CORT animals. Asterisk  
39 indicates significant difference between the PBS and leptin treated groups ( $p<0.05$ ).

40
