# Supplementary material
Source: PubMed Central journal article supplement (PMC2869265)

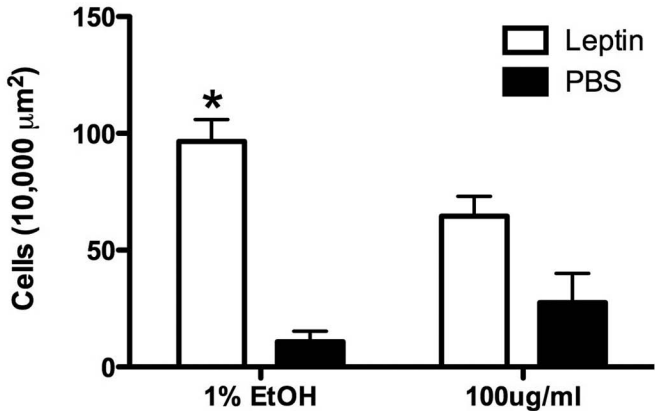

Supplement: en.2009-1436_2.pdf [file en.2009-1436_2.pdf]
